# Supplementary material
Source: publisher figshare collection journal article supplement (https://karger.figshare.com/ndownloader/files/22108245)
Supplement: Supplementary file 1 [file 22108245]

**Supplemental table 1.** Comparison of the five subscores of the Revised Version of the Ability for Basic Movement Scale score between the independent and dependent gait groups on 14 days from admission

|  | Independent at 14day | Dependent at 14 day | Univariate analysis | Multivariate analysis |
| --- | --- | --- | --- | --- |
| Factors | n=24 | n=43 | p value | p value |
| turning over from the supine position | 6 (5,6) | 4 (1,6) | <0.001 | 0.665 |
| sitting up | 6 (4,6) | 2 (1,5) | <0.001 | 0.023 |
| remaining in sitting position | 6 (4,6) | 4 (1,6) | <0.001 | 0.095 |
| standing up | 6 (3,6) | 2 (1,4) | <0.001 | 0.395 |
| remaining in standing position | 6 (4,6) | 3 (1,5) | <0.001 | 0.307 |
